# Supplementary material for: Methane production enhancement from products of alkaline hydrogen peroxide pretreated sweet sorghum bagasse
Source: Royal Society of Chemistry journal article supplement (doi:10.1039/c6ra25798d), 2017-01-01
Supplement: c6ra25798d1.xlsx [file c6ra25798d1.xlsx]

## Sheet: Fig.1(a)
	Daily biogas production
	Untreated bagasse		Pretreated mixture		Pretreated bagasse		Pretreatment effluent
Time/d	Average	error	Average	error	Average	error	Average	error
0.6	5.17338	0.20157	1.62173	0.19572	0.41527	0.18307	1.291	0.16778
0.9	6.37546	0.18847	2.24933	0.27183	0.57638	0.20497	1.69703	0.25195
1.9	28.3679	1.14942	16.6455	2.78595	26.4593	0.02175	12.9429	0.82089
2.9	36.969	0.92792	27.5565	1.65562	51.8551	1.92365	10.3388	5.28822
3.9	24.1945	0.14821	35.2516	1.03704	66.7607	2.41027	18.9101	1.71323
4.8	22.5368	1.93163	29.9764	0.85959	41.674	2.0216	30.3245	0.89564
5.6	16.1241	2.73138	18.8136	0.95978	21.6882	2.23893	22.6262	2.80086
6.9	36.2908	1.94075	20.3989	2.39774	43.0808	3.36612	30.9456	2.88788
7.9	17.7408	1.79067	14.7364	0.50368	22.4726	2.27129	23.6323	1.82061
8.9	13.1522	0.72832	14.8497	1.44011	9.63802	1.14587	22.9326	0.64861
10	12.6098	1.01986	19.7171	0.54632	5.94535	2.46484	13.9057	1.5478
10.7	7.15697	1.14901	16.9693	2.21268	4.79685	0.13508	12.7928	1.87751
11.6	3.53202	0.25031	8.85403	2.62882	3.78224	1.11498	7.10852	0.6546
13	7.18529	0.21134	12.0444	1.06933	4.11366	0.06812	11.0869	0.16161
13.9	4.51003	0.19742	4.54483	0.5971	3.5123	0.20889	17.4713	0.08625
14.9	3.82753	0.00741	4.11641	0.41918	2.46144	0.01317	10.999	1.92398
15.9	3.29163	0.90918	4.36751	0.94566	1.56276	0.26537	6.70692	0.81365
17.6	3.46601	0.23889	3.08577	1.4658	2.41768	0.28021	6.76619	0.99572
19.7	4.80817	0.46137	4.22474	0.72946	2.80485	0.8918	11.4258	2.04453
20.7	1.4302	0.12143	1.86786	0.22137	1.36188	0.26832	4.32266	2.36573
21.9	2.98854	0.39758	3.42851	0.67414	4.4859	2.53769	7.0496	3.43768
22.9	0.79008	0.02831	0.69953	0.31116	1.34699	0.96141	2.18449	1.08379
24	1.53081	0.0447	1.53841	0.28277	2.39247	1.59876	2.25426	0.78558
25	1.19139	0.33434	1.19346	0.24377	1.55193	0.60789	1.89123	0.4564
26	0.31845	0.1575	0.30561	0.09714	1.16897	0.30098	1.05024	0.44113
27.7	0.36464	0.28648	0.75152	0.43165	2.07163	1.28765	2.13822	0.203231
29.9	1.3925	0.32541	1.73901	0.56222	0.39245	0.02897	2.86431	0.528002

## Sheet: Fig.1(b)
	cumulative methane production
	Untreated bagasse		Pretreated mixture		Pretreated bagasse		Pretreatment effluent
Time/d	Average	error	Average	error	Average	error	Average	error
0.6	5.17338	0.20157	1.62173	0.19572	0.41527	0.18307	1.291	0.16778
0.9	6.37546	0.18847	2.24933	0.27183	0.57638	0.20497	1.69703	0.25195
1.6	25.2946	1.05208	11.8715	1.93665	16.689	0.26917	12.1014	0.48946
1.9	34.7433	0.96094	18.8948	3.05778	27.0356	0.22672	14.6399	1.07283
2.6	60.4638	2.40561	37.1935	3.89404	63.3005	2.21631	20.6718	5.06757
2.9	71.7124	1.88887	46.4513	4.7134	78.8907	2.15037	24.9787	6.36105
3.6	88.4779	1.11252	69.6588	5.61244	126.402	2.54936	37.0889	6.58215
3.9	95.9068	2.03707	81.703	5.75045	145.651	0.2599	43.8889	8.07428
4.8	118.444	3.9687	111.679	4.89086	187.325	2.2815	74.2134	7.17864
5.6	134.568	6.70008	130.493	3.93107	209.014	0.04258	96.8397	9.9795
6.6	161.728	8.51367	146.484	2.59375	240.667	2.60434	120.003	8.36288
6.9	170.858	8.64083	150.892	1.53333	252.095	3.32354	127.785	7.09162
7.7	184.637	10.8709	162.142	3.05336	270.884	3.39079	148.335	5.08073
7.9	188.599	10.4315	165.628	2.03702	274.567	5.59483	151.418	5.27102
8.6	197.803	9.63566	176.06	1.48018	281.498	6.77934	169.769	5.8601
8.9	201.751	9.70319	180.478	0.59691	284.205	6.7407	174.35	4.6224
9.6	211.143	8.7424	192.586	0.03909	288.568	8.6539	183.243	4.40078
10	214.361	8.68333	200.195	0.05059	290.151	9.20554	188.256	3.0746
10.7	219.273	7.8492	210.919	0.67898	292.206	9.10959	196.729	1.82372
11	221.518	7.53431	217.164	2.16209	294.947	9.07046	201.049	1.19709
11.6	225.05	7.284	226.018	4.79091	298.73	7.95549	208.157	0.54249
13	232.236	7.07266	238.063	5.86024	302.843	7.88737	219.244	0.7041
13.6	234.737	7.18145	240.877	6.4215	304.638	7.35784	228.488	1.3937
13.9	236.746	7.27008	242.608	6.45735	306.356	7.67848	236.715	0.79035
14.6	239.25	7.37899	245.187	7.01471	307.816	7.62336	240.674	1.97171
15	240.573	7.26267	246.724	6.87652	308.817	7.66531	247.714	2.71433
15.6	241.616	6.62097	249.323	7.43787	310.021	7.22978	251.563	4.64227
15.9	243.865	8.17184	251.091	7.82218	310.38	7.39994	254.421	3.52798
17.6	247.331	7.93295	254.177	9.28799	312.797	7.11973	261.187	4.5237
19.7	252.139	8.39432	258.402	10.0174	315.602	6.22794	272.613	2.47917
20.7	253.569	8.27289	260.27	9.79607	316.964	5.95962	276.936	0.11344
21.6	254.791	7.93149	261.923	10.1162	319.03	5.35137	280.258	0.99162
21.9	256.558	7.8753	263.698	10.4702	321.45	3.42193	283.986	3.32424
22.9	257.348	7.847	264.398	10.7814	322.797	2.46052	286.17	4.40803
24	258.879	7.8023	265.936	11.0641	325.19	0.86176	288.424	5.19361
25	260.07	7.46795	267.13	11.3079	326.741	0.25387	290.316	5.65001
26	260.388	7.31046	267.435	11.2108	327.91	0.04711	291.366	6.09114
27.7	260.753	7.59693	268.187	10.7791	329.982	1.33477	293.504	6.29437
30	262.146	7.27152	269.926	10.2169	330.375	1.3058	296.368	6.82237

## Sheet: Supplemental table 1
Supplemental table 1 RSMPE and AIC of different models
Model	Untreated bagasse		Pretreated mixture		Pretreated bagasse		Pretreatment effluent
	RMSPE	AIC	RMSPE	AIC	RMSPE	AIC	RMSPE	AIC
Fitzhugh	2.82	90.01	4.17	120.51	6.55	155.77	4.25	122.13
Monomolecular	5.62	143.88	8.12	172.5	13.61	212.82	10.8	194.78
Cone	2.72	87.14	4.72	130.27	4.42	125.03	3.52	107.3
Gompertz	5.34	139.89	6.38	153.72	8.07	172.03	6.67	157.21

## Sheet: Fig.3(a-d)
	a		b		c		d
	Untreated bagasse		Pretreated mixture		Pretreated bagasse		Pretreatment effluent
Time/d	Experimental	Predicted	Experimental	Predicted	Experimental	Predicted	Experimental	Predicted
0.6	5.17338	4.39279	1.62173	2.79949	0.41527	1.88795	1.291	1.13812
0.9	6.37546	9.04009	2.24933	6.04601	0.57638	5.15636	1.69703	2.60077
1.6	25.2946	25.581	11.8715	18.0393	16.689	22.2501	12.1014	8.82917
1.9	34.7433	33.9833	18.8948	24.2834	27.0356	33.2097	14.6399	12.4821
2.6	60.4638	56.4795	37.1935	41.5164	63.3005	67.4337	20.6718	23.7777
2.9	71.7124	66.1275	46.4513	49.1782	78.8907	83.5558	24.9787	29.3179
3.6	88.4779	89.314	69.6588	68.4216	126.402	123.802	37.0889	44.4988
3.9	95.9068	98.5051	81.703	76.428	145.651	139.829	43.8889	51.3118
4.8	118.444	125.184	111.679	101.155	187.325	184.712	74.2134	74.0212
5.6	134.568	145.108	130.493	121.343	209.014	215.391	96.8397	94.2522
6.6	161.728	166.165	146.484	144.633	240.667	244.239	120.003	119.241
6.9	170.858	171.512	150.892	150.908	252.095	250.919	127.785	126.25
7.7	184.637	183.805	162.142	165.937	270.884	265.24	148.335	143.476
7.9	188.599	187.476	165.628	170.594	274.567	269.234	151.418	148.937
8.6	197.803	196.857	176.06	182.855	281.498	278.844	169.769	163.589
8.9	201.751	200.322	180.478	187.514	284.205	282.176	174.35	169.261
9.6	211.143	207.894	192.586	197.931	288.568	289.053	183.243	182.163
10	214.361	211.85	200.195	203.493	290.151	292.424	188.256	189.185
10.7	219.273	217.183	210.919	211.108	292.206	296.729	196.729	198.963
11	221.518	219.608	217.164	214.606	294.947	298.595	201.049	203.527
11.6	225.05	224.169	226.018	221.231	298.73	301.952	208.157	212.312
13	232.236	231.98	238.063	232.617	302.843	307.233	219.244	227.954
13.6	234.737	235.319	240.877	237.445	304.638	309.31	228.488	234.864
13.9	236.746	236.527	242.608	239.176	306.356	310.034	236.715	237.395
14.6	239.25	239.432	245.187	243.293	307.816	311.718	240.674	243.548
14.9	240.573	240.607	246.724	244.934	308.817	312.375	247.714	246.061
15.6	241.616	242.988	249.323	248.203	310.021	313.665	251.563	251.2
15.9	243.865	243.986	251.091	249.547	310.38	314.189	254.421	253.369
17.6	247.331	248.613	254.177	255.507	312.797	316.486	261.187	263.539
19.7	252.139	252.953	258.402	260.53	315.602	318.437	272.613	273.212
20.7	253.569	254.636	260.27	262.277	316.964	319.139	276.936	276.986
21.6	254.791	256.028	261.923	263.616	319.03	319.696	280.258	280.112
21.9	256.558	256.429	263.698	263.983	321.45	319.852	283.986	281.013
22.9	257.348	257.699	264.398	265.083	322.797	320.335	286.17	283.867
24	258.879	258.872	265.936	266.01	325.19	320.764	288.424	286.499
25	260.07	259.913	267.13	266.756	326.741	321.131	290.316	288.833
26	260.388	260.807	267.435	267.335	327.91	321.435	291.366	290.831
27.7	260.753	262.102	268.187	268.068	329.982	321.858	293.504	293.716
30	262.146	263.576	269.926	268.741	330.375	322.311	296.368	296.979
